# Supplementary material for: Upregulation of spinal ASIC1 by miR‐485 mediates enterodynia in adult offspring rats with prenatal maternal stress
Source: PubMed Central journal article supplement (PMC7816206; doi:10.1111/cns.13542), 2020-12-13

## Full unedited gel/blot for Figure 1 B

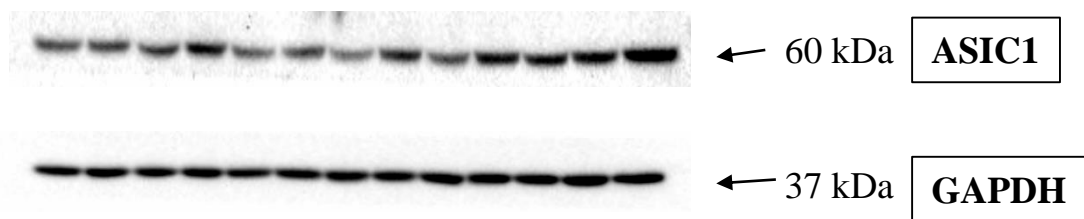

# Full unedited gel/blot for Figure 1 C

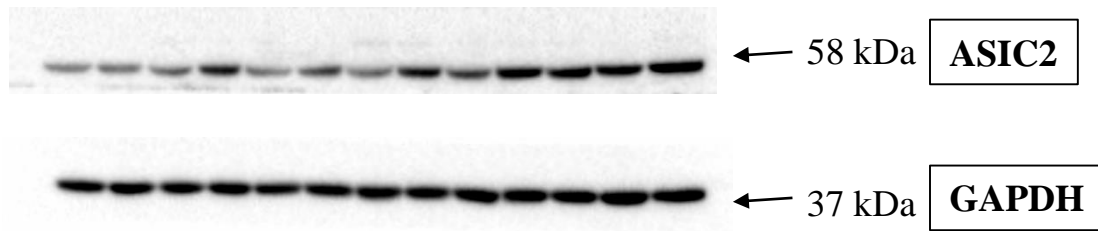

# Full unedited gel/blot for Figure 1 D

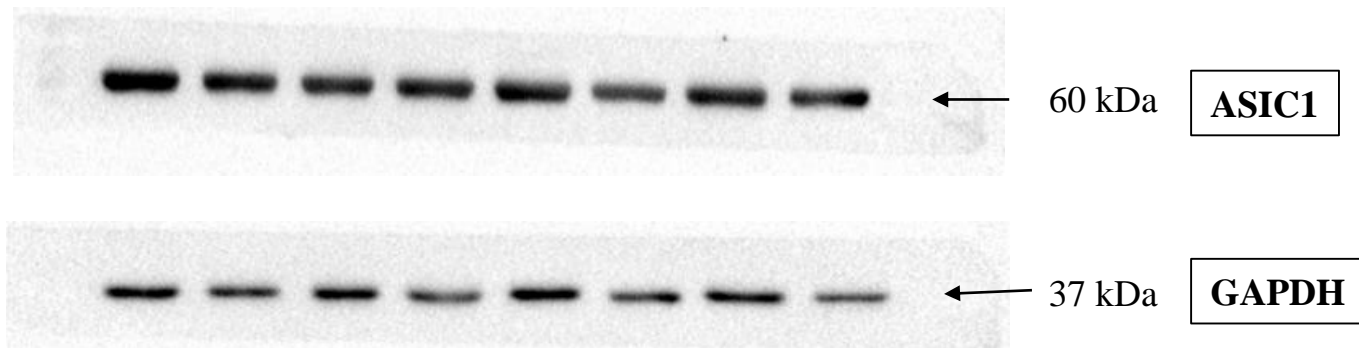

# Full unedited gel/blot for Figure 5 A

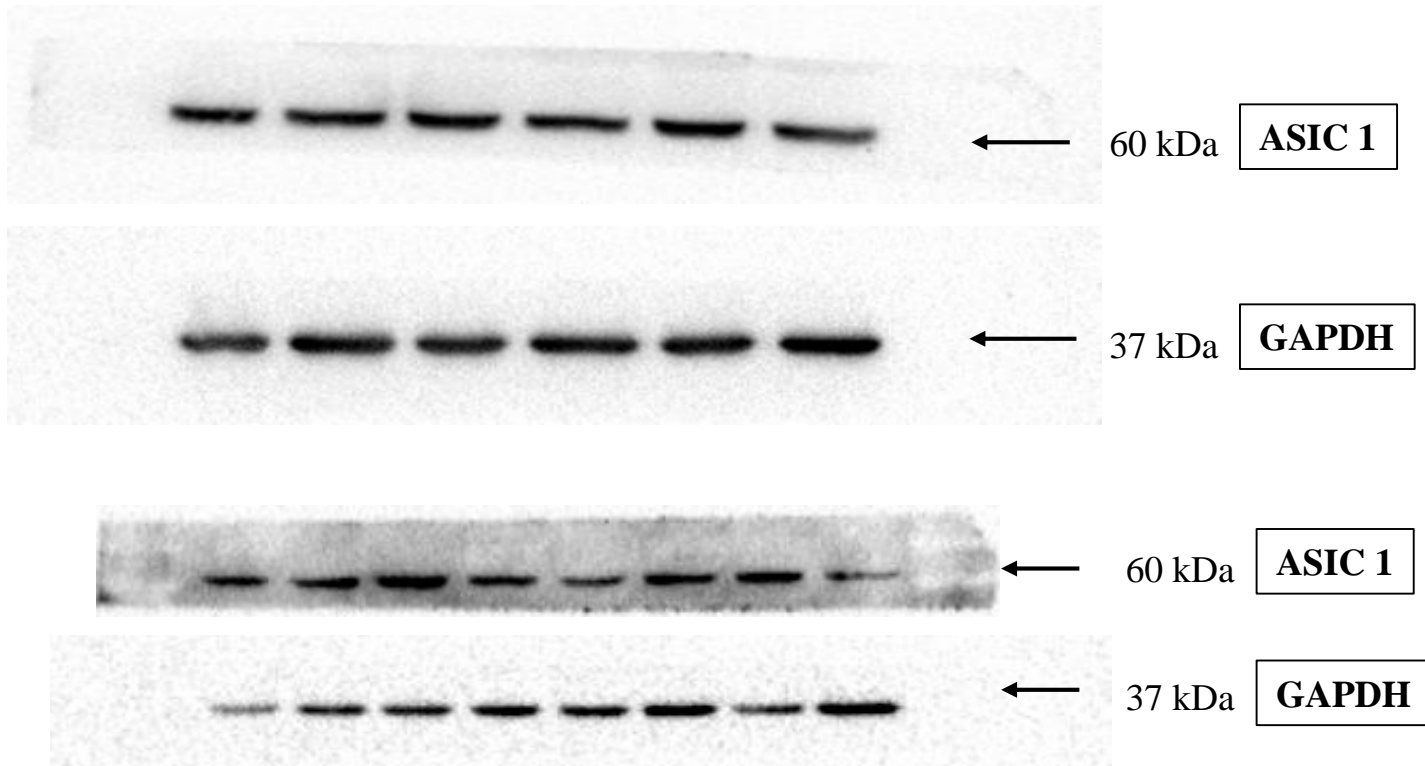

Supplement: CNS-27-244-s003.pdf [file CNS-27-244-s003.pdf]
